# Supplementary material
Source: HighWire-hosted journal article supplement (https://bjsm.bmj.com/content/bjsports-2021-104569)
Supplement: inline-supplementary-material-1 [file inline-supplementary-material-1.pdf]

UCI 2016 ROAD WORLD CHAMPIONSHIPS DOHA 2016 QATAR

ASPETAR اسپتار

# BEAT THE HEAT



IAAF | The Home of World Athletics ASPETAR اسپتار

## Beat the heat

IAAF World Athletics Championships Doha 2019 and the Olympic Games Tokyo 2020.



ATHLETE 365

# BEAT THE HEAT

TOKYO 2020 OLYMPIC GAMES

## 10 TOP TIPS

- Heat acclimatization by training in the heat for at least two weeks.
- If you cannot acclimatise for two weeks, try at least one week!
- Implement your hydration plan starting in the days and weeks preceding the event.
- Use pre-cooling strategies during your warm-up (e.g. ice vest).
- Test your cooling strategies during practice prior to the event/competition.
- Do not use clothing that limits sweat evaporation.
- Many medications can impair your ability to tolerate heat, so discuss your medications with your sports physician.
- Diarrhoea and vomiting impair your hydration status and will require the use of Oral Rehydration Solutions (ORS).
- Use a non-greasy sunscreen.
- Use a hat and Category 3 sunglasses.

To find out more visit  
[www.olympic.org/athlete365/beat-the-heat](http://www.olympic.org/athlete365/beat-the-heat)
