# Supplementary material
Source: HighWire-hosted journal article supplement (https://bjsm.bmj.com/content/bjsports-2021-104569)

## Beat the heat IAAF World Athletics Championships Doha 2019 Questionnaire English

Name: \_\_\_\_\_ Date: \_\_\_\_/\_\_\_\_/2019 Gender: M / F, Height: \_\_\_\_\_ cm,

Body mass: \_\_\_\_\_ kg, Age: \_\_\_\_\_ yrs National team: \_\_\_\_\_

## 1. Have you ever experienced the following while training or competing in the heat?

☐ Cramping ☐ Vomiting ☐ Nausea ☐ Severe headache ☐ Collapsing – fainting☐ Other: \_\_\_\_\_

## 2. Have you ever been clinically diagnosed with exertional heat illness? Yes / No

If yes, was it: ☐ Dehydration ☐ Hyponatremia ☐ Heat exhaustion ☐ Heat stroke

## 3. Do you usually live or train in a hot environment? Yes / No

## 4. In preparation for this World Championship, did you specifically?

☐ Train in a natural hot environment - country (for \_\_\_\_ days before Doha)☐ Train in an artificial hot room - laboratory (for \_\_\_\_ days before Doha)☐ Did not train in the heat before Doha

## 5. Have you ever measured your core temperature during training? Yes / No

If yes, how did you measure it: \_\_\_\_\_

## 6. During your taper, did you perform any passive heat exposures? Yes / No

☐ Hot water immersion ☐ Sauna ☐ Other: \_\_\_\_\_

## 13. During the 10 days preceding this event did you experience?

☐ No illness ☐ Stomach pain ☐ Insomnia ☐ Food poisoning ☐ Gastroenteritis ☐ Vaccination☐ Diarrhoea ☐ Vomiting ☐ Fever ☐ Congestion ☐ Other: \_\_\_\_\_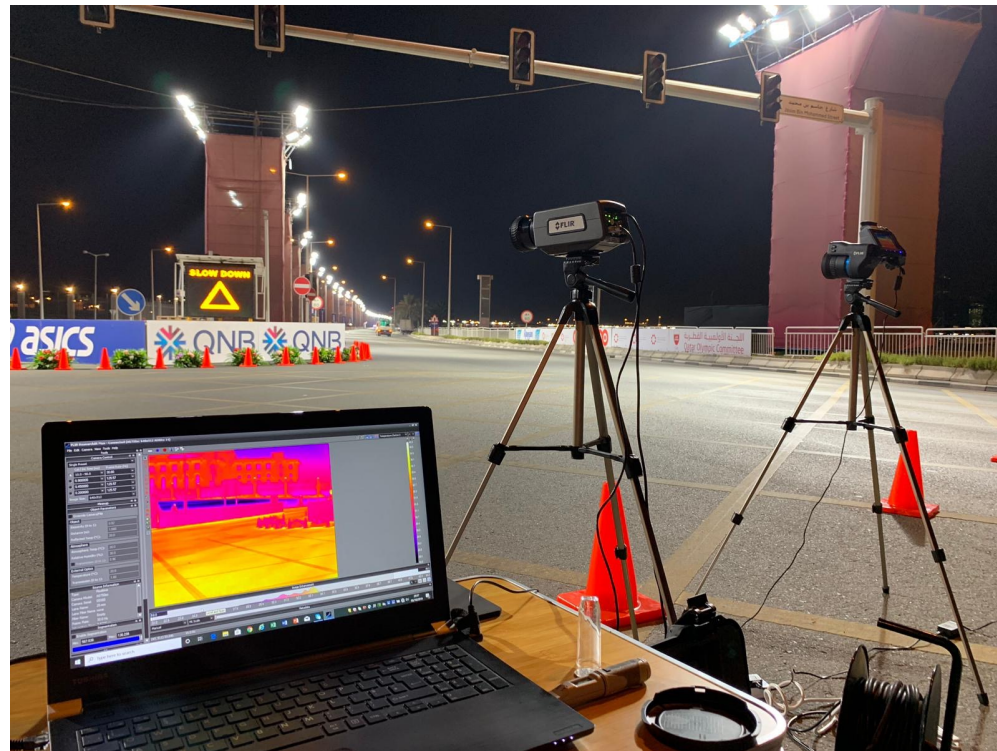

Supplement: inline-supplementary-material-2 [file inline-supplementary-material-2.pdf]
