# Supplementary material
Source: HighWire-hosted journal article supplement (https://bjsm.bmj.com/content/bjsports-2021-104569)
Supplement: inline-supplementary-material-3 [file inline-supplementary-material-3.pdf]

|                     | Year | City       | Marathon |       | 20KRW |       | 50KRW |       |      |
|---------------------|------|------------|----------|-------|-------|-------|-------|-------|------|
|                     |      |            | Men      | Women | Men   | Women | Men   | Women |      |
| <b>DNF (%)</b>      | 1983 | Helsinki   | 22.2     | 13.6  | 5.0   | N/A   | 13.9  | N/A   |      |
|                     | 1987 | Rome       | 29.9     | 21.4  | 4.8   | N/A   | 5.4   | N/A   |      |
|                     | 1991 | Tokyo      | 40.0     | 38.5  | 5.4   | N/A   | 31.6  | N/A   |      |
|                     | 1993 | Stuttgart  | 37.7     | 28.1  | 10.6  | N/A   | 11.1  | N/A   |      |
|                     | 1995 | Gothenburg | 32.1     | 25.6  | 13.0  | N/A   | 19.5  | N/A   |      |
|                     | 1997 | Athens     | 35.2     | 27.0  | 10.2  | N/A   | 11.9  | N/A   |      |
|                     | 1999 | Seville    | 18.8     | 17.6  | 17.9  | 13.7  | 19.2  | N/A   |      |
|                     | 2001 | Edmonton   | 24.7     | 10.3  | 10.8  | 0.0   | 14.6  | N/A   |      |
|                     | 2003 | Paris      | 22.5     | 8.8   | 0.0   | 11.9  | 12.8  | N/A   |      |
|                     | 2005 | Helsinki   | 35.1     | 10.5  | 7.0   | 12.8  | 15.9  | N/A   |      |
|                     | 2007 | Osaka      | 32.9     | 13.6  | 7.1   | 11.9  | 25.9  | N/A   |      |
|                     | 2009 | Berlin     | 23.1     | 14.1  | 6.0   | 6.3   | 29.2  | N/A   |      |
|                     | 2011 | Daegu      | 23.9     | 13.0  | 8.7   | 8.0   | 14.0  | N/A   |      |
|                     | 2013 | Moscow     | 26.1     | 32.9  | 9.4   | 1.6   | 10.0  | N/A   |      |
|                     | 2015 | Beijing    | 37.3     | 20.0  | 9.8   | 2.0   | 17.0  | N/A   |      |
|                     | 2017 | London     | 27.6     | 14.3  | 4.7   | 3.3   | 12.8  | 28.6  |      |
|                     |      |            | Average  | 29.3  | 19.3  | 8.2   | 7.2   | 16.5  | 28.6 |
|                     |      |            | Minimum  | 18.8  | 8.8   | 0.0   | 0.0   | 5.4   | 28.6 |
|                     |      |            | Maximum  | 40.0  | 38.5  | 17.9  | 13.7  | 31.6  | 28.6 |
|                     |      | 2019       | Doha     | 24.7  | 41.2  | 13.5  | 6.7   | 29.5  | 26.1 |
| <b>Winner (%WR)</b> | 1983 | Helsinki   | 1.4      | 3.8   | 1.5   | N/A   | 1.1   | N/A   |      |
|                     | 1987 | Rome       | 3.6      | 3.0   | 2.0   | N/A   | 1.2   | N/A   |      |
|                     | 1991 | Tokyo      | 6.4      | 6.2   | 1.8   | N/A   | 7.1   | N/A   |      |
|                     | 1993 | Stuttgart  | 5.6      | 6.3   | 5.5   | N/A   | 1.8   | N/A   |      |
|                     | 1995 | Gothenburg | 3.8      | 3.2   | 2.5   | N/A   | 2.8   | N/A   |      |
|                     | 1997 | Athens     | 5.1      | 6.2   | 4.7   | N/A   | 3.3   | N/A   |      |
|                     | 1999 | Seville    | 6.0      | 4.4   | 7.5   | 3.8   | 4.7   | N/A   |      |
|                     | 2001 | Edmonton   | 5.6      | 3.8   | 3.5   | 3.5   | 2.2   | N/A   |      |
|                     | 2003 | Paris      | 2.3      | 6.3   | 0.0   | 2.4   | -0.3  | N/A   |      |
|                     | 2005 | Helsinki   | 4.2      | 4.1   | 1.6   | -0.8  | 1.1   | N/A   |      |
|                     | 2007 | Osaka      | 8.9      | 11.2  | 6.4   | 5.2   | 3.8   | N/A   |      |
|                     | 2009 | Berlin     | 2.4      | 7.3   | 2.4   | 2.9   | 3.3   | N/A   |      |
|                     | 2011 | Daegu      | 2.9      | 9.8   | 4.4   | 5.7   | 4.0   | N/A   |      |
|                     | 2013 | Moscow     | 5.0      | 7.6   | 4.8   | 2.5   | 1.7   | N/A   |      |
|                     | 2015 | Beijing    | 7.7      | 9.0   | 3.4   | 3.7   | 3.8   | N/A   |      |
|                     | 2017 | London     | 4.5      | 8.7   | 3.0   | 2.0   | 0.3   | -1.0  |      |
|                     |      | Average    | 4.7      | 6.3   | 3.4   | 3.1   | 2.6   | -1.0  |      |
|                     |      | Minimum    | 1.4      | 3.0   | 0.0   | -0.8  | -0.3  | -1.0  |      |
|                     |      | Maximum    | 8.9      | 11.2  | 7.5   | 5.7   | 7.1   | -1.0  |      |
|                     | 2019 | Doha       | 7.4      | 11.5  | 13.0  | 11.0  | 15.0  | 11.1  |      |
